# Supplementary material for: Expression and methylation status of LAMA2 are associated with the invasiveness of nonfunctioning PitNET
Source: PubMed Central journal article supplement — Ther Adv Endocrinol Metab. 2019 Jan 29;10:2042018818821296. doi: 10.1177/2042018818821296 (PMC6351710; doi:10.1177/2042018818821296), 2019-01-29
Supplement: Supplemental_Material.pdf [file Supplemental_Material.pdf]

Supplementary figures and figure legends

Figure S1

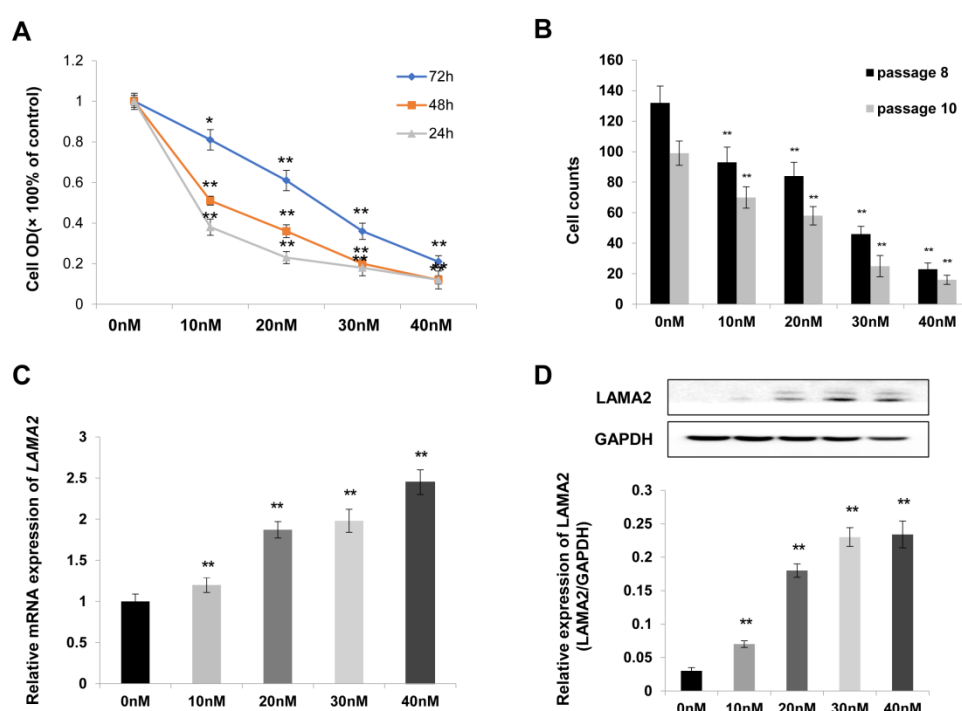

Figure S1. Demethylation of LAMA2 could affect LAMA2 expression and cell proliferation of pituitary adenomas, under the condition of using serum-free media supplemented with insulin (5 ng/ml) (SF-I medium). (A) Relative optical density (OD) of GH3 pituitary adenoma cells at 24, 48 and 72 h after treatment with 5-aza-2-deoxycytidine at the indicated concentrations. OD values are relative to those of the control (the concentration of DAC: 0 nM) and are determined using an MTT assay. (B) After 72 h of treatment, viability in two passages of GH3 cells significantly decreased with increasing concentrations of 5-aza-2-deoxycytidine (passage 8 [black] versus passage 10 [gray],  $P < 0.01$ ). (C) RT-qPCR analysis of LAMA2 mRNA expression at 72 h after treatment with 5-aza-2-deoxycytidine at a range of concentrations. (D) Protein expression of LAMA2 and GAPDH in GH3 pituitary adenoma cells at 72 h after treatment with 5-aza-2-deoxycytidine at a range of concentrations. Quantitative analyses of western blotting results in GH3 pituitary adenoma cells. All data are presented as the mean  $\pm$  SEM, \* $p < 0.05$ ; \*\* $p < 0.01$ ; RT-qPCR, real-time quantitative PCR.
